# Supplementary material for: Comparative Study on Grape Berry Anthocyanins of Various Teinturier Varieties
Source: MDPI journal article supplement (doi:10.3390/foods11223668), 2022-11-16
Supplement: s1 [file s1]

# Comparative study on grape berry anthocyanins of various teinturier varieties

<sup>1</sup> Research Institute for Viticulture and Oenology, University of Pécs, 7634 Pécs, Hungary.  
<sup>2</sup> Department of Analytical and Environmental Chemistry, Faculty of Sciences, University of Pécs, 7624 Pécs, Hungary.  
<sup>3</sup> Julius Kühn Institute (JKI) - Federal Research Centre for Cultivated Plants, Institute for Grapevine Breeding Geilweilerhof, Siebeldingen, 76833, Germany.  
<sup>4</sup> Institute of Bioanalysis, Medical School, University of Pécs, 7624 Pécs, Hungary.  
<sup>5</sup> Department of Biochemistry and Medical Chemistry, Medical School, University of Pécs, 7624 Pécs, Hungary.

The chart illustrates the genealogical relationships between various wine grape varieties. Varieties in red boxes represent the primary focus of the study, while those in blue boxes represent related varieties. The chart is organized into several main branches, each representing a different lineage.

- Turán (15834)** (red box) is the root of the first major branch. It leads to **Gárdonyi Géza (4417)**, which further branches into **Medoc Noir (17316)** and **Csabagyöngye (9166)**.
  - Medoc Noir (17316)** leads to **Chasselas**, which then branches into **Ingram's Muscat (5531)** and **Muscat a Petits Grains Blanc (8193)**.
  - Csabagyöngye (9166)** leads to **Madeleine Angevine (7062)** and **Muscat Fleur D'Oranger (8221)**.
    - Madeleine Angevine (7062)** branches into **Blanc D'Ambre (1421)** and **Madeleine Royale (7068)**.
      - Blanc D'Ambre (1421)** leads to **Schiras Dr. Houbdine (17347)** and **Chasselas**.
      - Madeleine Royale (7068)** leads to **Pinot** and **Schiava Grossa (10823)**.
    - Muscat Fleur D'Oranger (8221)** leads to **Muscat a Petits Grains Blanc (8193)** and **Chasselas Blanc**.
- Cabernet Mitos (15499), Palas (16871)** (red box) leads to **Bikavér 8 (23699)**, which further branches into **Blaufränkisch (1459)** and **Teinturier (12304)**.
  - Blaufränkisch (1459)** leads to **Teinturier (12304)**.
- Kurucvér (6573), Bíborkadarka (1339)** (red box) leads to **Bikavér 8 (23699)**, which further branches into **Kadarka** and **Carignan Bouschet (2096), Grand Noir (5012)** (blue box).
  - Kadarka** leads to **Oeillade Bouschet I (8704)** and **Bouschet Petit (1619)** (blue box).
    - Oeillade Bouschet I (8704)** leads to **Oeillade Noire (8702)** and **Bouschet Petit (1619)**.
    - Bouschet Petit (1619)** leads to **Aramon Noir (544)** and **Teinturier (12304)** (red box).
      - Aramon Noir (544)** leads to **Ouliven (8845)** and **Heunisch weiss (5374)**.
  - Carignan Bouschet (2096), Grand Noir (5012)** (blue box) leads to **Graciano (4935)** and **Kadarka**.
  - Kármin (5999)** (red box) leads to **Kadarka**.
  - Muscat Bouschet (8194)** (red box) leads to **Muscat Fleur D'Oranger (8221)** and **Garnacha Tinta (4461)**.
    - Muscat Fleur D'Oranger (8221)** leads to **Muscat a Petits Grains Blanc (8193)** and **Chasselas Blanc**.
- Alicante Ganzin (303)** (red box) leads to **Alicante Henri Bouschet (304)** (red box) and **Ganzin 4 (17851)**.
  - Alicante Henri Bouschet (304)** leads to **Aramon Noir (544)** and **Rupestris Ganzin (10396)**.
  - Ganzin 4 (17851)** leads to **Rupestris Ganzin (10396)**.
- Royalty (10288)** (red box) leads to **Alicante Ganzin (303)** and **Trousseau Noir (12668)** (blue box).
  - Trousseau Noir (12668)** leads to **Savagnin Blanc (17636)** and **?**.

**Figure S1.** Pedigrees of the studied teinturier grapevine varieties. Variety numbers in *Vitis* International Variety Catalogue (VIVC) are given in brackets. Varieties used in this study are marked with a red frame. If the pedigree is confirmed by SSR markers [VIVC, [www.vivc.de](http://www.vivc.de)], the cultivar name is highlighted with blue color. SSR markers did not confirm that ‘Biborkadarka’ is the progeny of ‘Muscat Bouschet’.

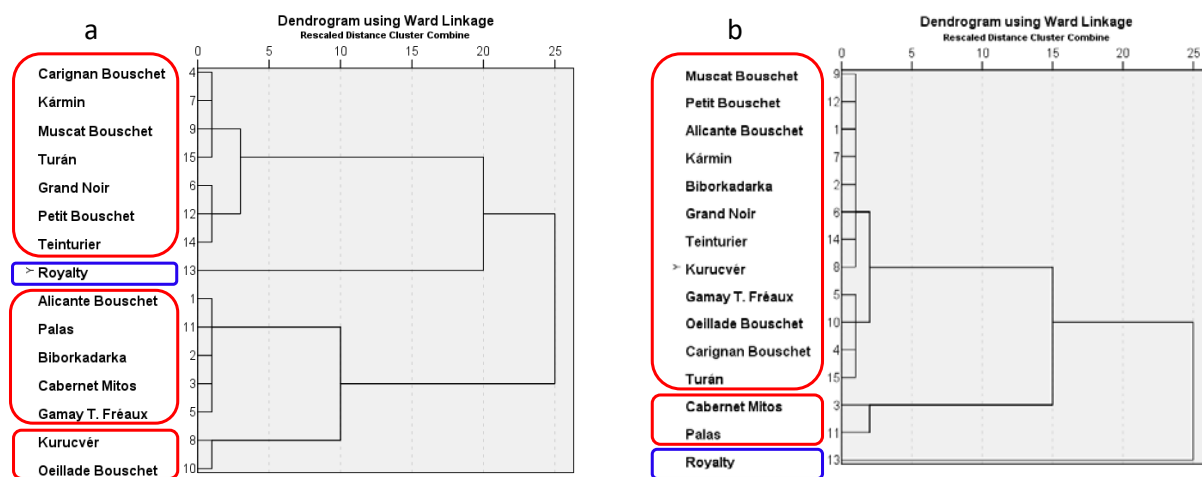

**Figure S2.** Dendrograms of grape (a) skin and (b) juice samples based on the similarities in their anthocyanin composition.

**Table S1.** Analyzed grapevine accessions, genotypic data of 9 SSR loci and allele status at the berry color locus.

| Prime name<br>(Official Variety Name) | Accession Name<br>(Name in<br>Repository) | Variety<br>number<br>VIVC | MybA1a<br>white | MybA1c<br>red | MybA1t<br>repeat<br>number | VVMD27 | VVS2 | VVMD7 | VVMD5 | VrZAG62 | VrZAG79 | VVMD28 | VVMD32 | VVMD25 |     |     |     |     |     |     |     |     |     |
|---------------------------------------|-------------------------------------------|---------------------------|-----------------|---------------|----------------------------|--------|------|-------|-------|---------|---------|--------|--------|--------|-----|-----|-----|-----|-----|-----|-----|-----|-----|
| Alicante Henri Bouschet               | Alicante Bouschet                         | 304                       | -               | x             | 2                          | 182    | 195  | 133   | 145   | 239     | 243     | 228    | 240    | 188    | 188 | 243 | 257 | 244 | 260 | 250 | 272 | 241 | 241 |
| Biborkadarka                          | Bíborkadarka                              | 1339                      | -               | x             | 2                          | 195    | 195  | 133   | 145   | 239     | 255     | 228    | 228    | 188    | 204 | 251 | 257 | 244 | 260 | 272 | 272 | 239 | 241 |
| Cabernet Mitos                        | Cabernet Mitos                            | 15499                     | x               | -             | 5                          | 180    | 195  | 137   | 143   | 239     | 239     | 228    | 240    | 194    | 194 | 251 | 255 | 228 | 246 | 250 | 272 | 239 | 249 |
| Carignan Bouschet                     | Carignan Bouschet                         | 2096                      | x               | -             | 2                          | 182    | 195  | 137   | 143   | 239     | 243     | 236    | 240    | 188    | 196 | 243 | 257 | 228 | 260 | 250 | 250 | 249 | 255 |
| Gamay Teinturier Freaux               | Gamay Fréaux                              | 4382                      | x               | x             | -                          | 182    | 190  | 133   | 137   | 239     | 249     | 236    | 240    | 194    | 204 | 243 | 245 | 218 | 246 | 240 | 272 | 239 | 239 |
| Grand Noir                            | Grand Noir                                | 5012                      | -               | x             | 2                          | 182    | 184  | 139   | 151   | 239     | 243     | 228    | 236    | 188    | 188 | 243 | 259 | 236 | 244 | 240 | 250 | 249 | 271 |
| Karmin                                | Kármin                                    | 5999                      | -               | x             | 2                          | 182    | 186  | 133   | 133   | 239     | 255     | 228    | 240    | 196    | 204 | 243 | 251 | 228 | 260 | 250 | 272 | 239 | 241 |
| Kurucver                              | Kurucvér                                  | 6573                      | -               | x             | 2                          | 180    | 195  | 133   | 133   | 239     | 255     | 228    | 240    | 196    | 204 | 249 | 255 | 228 | 260 | 250 | 272 | 239 | 249 |
| Muscat Bouschet                       | Muscat Bouschet                           | 8194                      | x               | -             | 2                          | 180    | 190  | 133   | 151   | 239     | 247     | 238    | 240    | 196    | 204 | 245 | 255 | 246 | 260 | 240 | 250 | 249 | 249 |
| Oeillade Bouschet 1                   | Oeillade Bouschet                         | 8704                      | -               | x             | 2                          | 182    | 182  | 143   | 143   | 239     | 239     | 228    | 228    | 186    | 194 | 259 | 259 | 228 | 258 | 250 | 250 | 255 | 255 |
| Palas                                 | Palas                                     | 16871                     | x               | -             | 5                          | 180    | 195  | 137   | 143   | 239     | 239     | 240    | 242    | 194    | 204 | 251 | 255 | 228 | 246 | 272 | 272 | 239 | 249 |
| Bouschet Petit                        | Petit Bouschet                            | 1619                      | -               | x             | 2                          | 182    | 190  | 133   | 151   | 239     | 243     | 236    | 240    | 188    | 196 | 243 | 245 | 236 | 260 | 250 | 272 | 241 | 249 |
| Royalty                               | Kék Royalti                               | 10288                     | -               | x             | 2                          | 176    | 195  | 145   | 151   | 249     | 257     | 236    | 240    | 188    | 198 | 247 | 257 | 228 | 248 | 250 | 256 | 241 | 249 |
| Teinturier                            | Teinturier Femelle                        | 12304                     | x               | x             | 3                          | 180    | 190  | 137   | 151   | 239     | 243     | 240    | 240    | 188    | 194 | 245 | 255 | 228 | 236 | 272 | 272 | 239 | 249 |
| Turan                                 | Turán                                     | 15834                     | -               | x             | 2                          | 180    | 180  | 133   | 133   | 239     | 249     | 228    | 238    | 186    | 194 | 255 | 255 | 218 | 260 | 240 | 272 | 239 | 241 |

**Table S2.** Berry weight and different parameters of juice samples obtained by pressing of peeled berry flesh.

| Cultivar          | Weight<br>(g/berry) | pH  | TSS<br>(°Brix) | tartaric acid<br>(g/L) | malic acid<br>(g/L) | citric acid<br>(g/L) |
|-------------------|---------------------|-----|----------------|------------------------|---------------------|----------------------|
| Alicante Bouschet | 2.35                | 3.4 | 17.3           | 2.30                   | 5.67                | 0.26                 |
| Bíborkadarka      | 2.92                | 3.8 | 17.4           | 1.96                   | 3.31                | 0.18                 |
| Cabernet Mitos    | 1.54                | 4.0 | 23.0           | 4.88                   | 4.94                | 0.40                 |
| Carignan Bouschet | 1.54                | 3.1 | 16.2           | 3.63                   | 2.60                | 0.22                 |
| Gamay Fréaux      | 1.81                | 3.4 | 20.6           | 3.62                   | 3.87                | 0.18                 |
| Grand Noir        | 2.95                | 3.3 | 16.2           | 2.84                   | 2.54                | 0.20                 |
| Kármin            | 2.95                | 3.1 | 17.8           | 2.43                   | 4.84                | 0.23                 |
| Kurucvér          | 1.52                | 4.0 | 18.5           | 2.31                   | 3.15                | 0.16                 |
| Muscat Bouschet   | 1.01                | 4.2 | 21.5           | 2.56                   | 3.47                | 0.22                 |
| Oeillade Bouschet | 2.08                | 3.0 | 17.0           | 3.62                   | 3.81                | 0.22                 |
| Palas             | 2.21                | 4.1 | 21.9           | 2.94                   | 5.32                | 0.34                 |
| Petit Bouschet    | 1.51                | 3.4 | 16.8           | 2.27                   | 3.52                | 0.21                 |
| Royalty           | 2.39                | 3.4 | 18.5           | 3.52                   | 2.69                | 0.16                 |
| Teinturier        | 1.67                | 3.5 | 17.5           | 2.54                   | 4.14                | 0.25                 |
| Turán             | 1.64                | 4.3 | 23.4           | 3.87                   | 2.32                | 0.22                 |

**Table S3.** Level of individual anthocyanins in berry skin samples of various teinturier grapevine cultivars.

| Cultivars         | Ptd-3,5-diglc | Pnd-3,5-diglc | Dph-ac-glc   | Mvd-3-ac-glc-5-glc | Ptd-ac-glc | Pnd-ac-glc | Dph-cm-glc   | Mvd-ac-glc   | Cyd-cm-glc | Mvd-3-cm-glc-5-glc | Mvd-cis-cm-glc | Ptd-cm-glc     | Pnd-cm-glc   | Mvd-trans-cm-glc |
|-------------------|---------------|---------------|--------------|--------------------|------------|------------|--------------|--------------|------------|--------------------|----------------|----------------|--------------|------------------|
| Alicante Bouschet | nd            | nd            | trace        | nd                 | nd         | 90.9±0.1   | 134.1±23.7   | 512.0±28.1   | trace      | trace              | trace          | 212.3±9.1      | 835.4±44.4   | 3589.4±354.7     |
| Biborkadarka      | nd            | trace         | trace        | nd                 | trace      | 88.7±9.0   | 267.3±43.1   | 644.6±86.2   | 92.2±8.9   | trace              | 170.6±59.1     | 357.1±51.4     | 903.4±95.0   | 5078.0±631.2     |
| Cabernet Mitos    | nd            | trace         | 418.4±25.7   | trace              | 475.9±35.9 | 530.9±26.2 | 428.9±26.3   | 3002.9±316.8 | trace      | trace              | trace          | 466.5±12.0     | 752.4±1.6    | 3965.1±209.0     |
| Carignan Bouschet | nd            | nd            | nd           | nd                 | nd         | 87.1±1.0   | 99.3±0.7     | 1198.8±47.3  | nd         | 107.1±4.5          | 82.2±6.6       | 191.1±1.5      | 375.0±3.5    | 4809.5±252.9     |
| Gamay Fréaux      | nd            | nd            | nd           | nd                 | nd         | trace      | trace        | 313.5±18.1   | trace      | trace              | 144.6±2.9      | 88.2±3.6       | 193.8±15.8   | 1123.3±50.4      |
| Grand Noir        | nd            | nd            | trace        | nd                 | trace      | trace      | trace        | 165.2±3.3    | trace      | trace              | trace          | trace          | 414.2±10.6   | 899.3±10.1       |
| Kármin            | nd            | trace         | trace        | nd                 | 86.5±6.2   | trace      | 146.3±13.6   | 1166.6±149.5 | trace      | trace              | trace          | 192.0±11.6     | 206.7±11.9   | 3029.1±195.2     |
| Kurucvér          | nd            | 313.4±105.6   | 1513.1±108.6 | 208.7±17.3         | 947.5±32.7 | 82.1±11.0  | 2511.7±248.1 | 2502.3±183.0 | 248.7±25.2 | 254.0±19.6         | trace          | 1240.7±13trace | 192.6±19.6   | 3803.8±452.0     |
| Muscat Bouschet   | nd            | 147.2±18.8    | trace        | nd                 | trace      | trace      | 231.4±8.4    | 312.3±15.8   | trace      | 250.9±19.0         | 119.9±32.5     | 305.0±6.4      | 980.9±6.1    | 3993.9±13.4      |
| Oeillade Bouschet | nd            | nd            | 927.1±39.4   | 86.6±0.3           | 843.7±48.9 | 200.9±0.4  | 1637.7±99.3  | 2751.9±126.4 | 279.1±5.9  | trace              | trace          | 1355.6±87.9    | 613.4±24.0   | 5444.9±387.5     |
| Palas             | nd            | nd            | 286.6±16.7   | trace              | 360.9±11.4 | 342.2±30.3 | 233.4±0.9    | 1665.4±126.8 | trace      | trace              | 113.3±6.6      | 247.3±2.4      | 394.7±6.6    | 1513.4±37.2      |
| Petit Bouschet    | nd            | trace         | trace        | nd                 | nd         | trace      | trace        | 155.5±24.9   | trace      | trace              | 64.0±1.0       | trace          | 552.9±5.5    | 1166.4±72.6      |
| Royalty           | 820.5±0.7     | 1754.9±278.7  | 92.6±4.1     | 906.1±38.8         | 93.6±11.2  | trace      | 2171.8±17.1  | 460.2±109.7  | 491.1±45.4 | 7070.9±324.6       | nd             | 848.2±6.3      | 176.6±12.2   | 2951.0±11.0      |
| Teinturier        | nd            | nd            | trace        | nd                 | 72.1±4.2   | 140.8±2.6  | trace        | 862.1±5.4    | nd         | trace              | 94.0±4.0       | trace          | 192.6±1.3    | 1190.2±11.8      |
| Turán             | nd            | nd            | 96.7±1.7     | nd                 | 157.4±8.8  | 210.2±4.4  | 697.8±64.9   | 1474.7±49.2  | 237.4±22.6 | 118.6±17.2         | 154.1±6.2      | 922.1±91.3     | 1265.0±110.8 | 7240.1±715.4     |

Data are expressed in malvidin-3-*O*-glucoside equivalent µg/g FW as mean values ± standard deviation; nd: not detected. Ptd-3,5-diglc: Petunidin-3,5-di-*O*-glucoside, Pnd-3,5-diglc: Peonidin-3,5-di-*O*-glucoside, Dph-ac-glc: Delphinidin-3-*O*-(6-*O*-acetyl-glucoside), Mvd-3-ac-glc-5-glc: Malvidin-3-*O*-(6-*O*-acetyl-glucoside)-5-*O*-glucoside, Ptd-ac-glc: Petunidin-3-*O*-(6-*O*-acetyl-glucoside), Pnd-ac-glc: Peonidin-3-*O*-(6-*O*-acetyl-glucoside), Dph-cm-glc: Delphinidin-3-*O*-(6-*O*-p-coumaroyl-glucoside), Mvd-ac-glc: Malvidin-3-*O*-(6-*O*-acetyl-glucoside), Cyd-cm-glc: Cyanidin-3-*O*-(6-*O*-p-coumaroyl-glucoside), Mvd-cm-glc-5-glc: Malvidin-3-*O*-(6-*O*-coumaroyl-glucoside)-5-*O*-glucoside, Mvd-3-cis-cm-glc: Malvidin-3-*O*-(6-*O*-cis-p-coumaroyl-glucoside), Ptd-cm-glc: Petunidin-3-*O*-(6-*O*-trans-p-coumaroyl-glucoside), Pnd-cm-glc: Peonidin-3-*O*-(6-*O*-trans-p-coumaroyl-glucoside), Mvd-trans-cm-glc: Malvidin-3-*O*-(6-*O*-trans-p-coumaroyl-glucoside).

**Table S4.** Level of individual anthocyanins in berry juice samples of various teinturier grapevine cultivars.

| Cultivars         | Ptd-3,5-diglc | Pnd-3,5-diglc | Dph-ac-glc | Mvd-3-ac-glc-5-glc | Ptd-ac-glc | Pnd-ac-glc | Dph-cm-glc | Mvd-ac-glc | Cyd-cm-glc | Mvd-3-cm-glc-5-glc | Mvd-cis-cm-glc | Ptd-cm-glc | Pnd-cm-glc | Mvd-trans-cm-glc |
|-------------------|---------------|---------------|------------|--------------------|------------|------------|------------|------------|------------|--------------------|----------------|------------|------------|------------------|
| Alicante Bouschet | nd            | nd            | nd         | nd                 | nd         | 3.1±0.0    | nd         | trace      | trace      | nd                 | nd             | nd         | 5.2±0.4    | 1.3±0.1          |
| Bíborkadarka      | nd            | nd            | nd         | trace              | nd         | 1.9±0.1    | nd         | 1.0±0.1    | trace      | nd                 | trace          | nd         | 6.2±0.3    | 2.4±0.2          |
| Cabernet Mitos    | nd            | nd            | trace      | 4.6±0.2            | trace      | 65.4±2.2   | nd         | 69.9±1.3   | 6.5±0.5    | nd                 | 3.6±0.2        | trace      | 19.7±0.5   | 15.2±0.4         |
| Carignan Bouschet | nd            | nd            | nd         | nd                 | nd         | 6.8±0.1    | nd         | 4.2±0.1    | trace      | nd                 | trace          | nd         | 6.3±0.5    | 4.4±0.2          |
| Gamay Fréaux      | nd            | nd            | nd         | nd                 | nd         | 1.3±0.0    | nd         | 1.2±0.0    | trace      | nd                 | trace          | nd         | 1.8±0.2    | 1.2±0.1          |
| Grand Noir        | nd            | nd            | nd         | nd                 | nd         | 1.2±0.0    | nd         | trace      | trace      | nd                 | nd             | nd         | 1.6±0.2    | trace            |
| Kármin            | nd            | nd            | nd         | nd                 | nd         | 4.5±0.2    | nd         | 2.7±0.1    | nd         | nd                 | nd             | nd         | 3.8±0.3    | 2.0±0.1          |
| Kurucvér          | nd            | nd            | trace      | 1.9±0.2            | trace      | 3.1±0.1    | nd         | 10.8±0.4   | trace      | nd                 | trace          | trace      | 1.4±0.1    | 3.3±0.4          |
| Muscat Bouschet   | nd            | nd            | nd         | nd                 | nd         | 1.1±0.0    | nd         | trace      | trace      | nd                 | trace          | nd         | 2.0±0.1    | trace            |
| Oeillade Bouschet | nd            | nd            | trace      | trace              | trace      | 5.8±0.1    | nd         | 11.2±0.1   | trace      | nd                 | trace          | trace      | 5.7±0.3    | 7.1±0.7          |
| Palas             | nd            | nd            | trace      | 1.9±0.1            | trace      | 34.2±0.4   | nd         | 34.3±1.5   | 3.9±0.3    | nd                 | 2.3±0.2        | nd         | 5.1±0.3    | 3.5±0.3          |
| Petit Bouschet    | nd            | nd            | nd         | nd                 | nd         | 1.6±0.1    | nd         | trace      | trace      | nd                 | nd             | nd         | 2.7±0.2    | trace            |
| Royalty           | nd            | 434.0±3.7     | trace      | 10.8±0.1           | trace      | 2.8±0.1    | trace      | 3.2±0.1    | 43.9±3.1   | 42.1±3.0           | nd             | trace      | 4.7±0.5    | 6.8±0.6          |
| Teinturier        | nd            | nd            | trace      | nd                 | nd         | 7.9±0.1    | nd         | 1.9±0.1    | trace      | nd                 | nd             | nd         | 1.3±0.1    | trace            |
| Turán             | nd            | nd            | trace      | trace              | trace      | 7.2±0.4    | trace      | 9.1±0.4    | 2.4±0.2    | nd                 | trace          | 1.5±0.1    | 14.2±0.9   | 18.1±1.7         |

Data are expressed in malvidin-3-*O*-glucoside equivalent mg/L as mean values ± standard deviation; nd: not detected. Ptd-3,5-diglc: Petunidin-3,5-di-*O*-glucoside, Pnd-3,5-diglc: Peonidin-3,5-di-*O*-glucoside, Dph-ac-glc: Delphinidin-3-*O*-(6-*O*-acetyl-glucoside), Mvd-3-ac-glc-5-glc: Malvidin-3-*O*-(6-*O*-acetyl-glucoside)-5-*O*-glucoside, Ptd-ac-glc: Petunidin-3-*O*-(6-*O*-acetyl-glucoside), Pnd-ac-glc: Peonidin-3-*O*-(6-*O*-acetyl-glucoside), Dph-cm-glc: Delphinidin-3-*O*-(6-*O*-p-coumaroyl-glucoside), Mvd-ac-glc: Malvidin-3-*O*-(6-*O*-acetyl-glucoside), Cyd-cm-glc: Cyanidin-3-*O*-(6-*O*-p-coumaroyl-glucoside), Mvd-3-cm-glc-5-glc: Malvidin-3-*O*-(6-*O*-coumaroyl-glucoside)-5-*O*-glucoside, Mvd-cis-cm-glc: Malvidin-3-*O*-(6-*O*-cis-p-coumaroyl-glucoside), Ptd-cm-glc: Petunidin-3-*O*-(6-*O*-trans-p-coumaroyl-glucoside), Pnd-cm-glc: Peonidin-3-*O*-(6-*O*-trans-p-coumaroyl-glucoside), Mvd-trans-cm-glc: Malvidin-3-*O*-(6-*O*-trans-p-coumaroyl-glucoside)
